# Supplementary material
Source: ML conference proceedings conference paper supplement (https://openaccess.thecvf.com/content/ICCV2021/html/Zhao_M3D-VTON_A_Monocular-to-3D_ICCV_2021_paper.html)
Supplement: Supplementary file 1 [file Zhao_M3D-VTON_A_Monocular-to-3D_ICCV_2021_supplemental.zip]

Archive with 4 entries (4 files):
- 08611-supp.pdf
- __MACOSX/._08611-supp.pdf
- 08611-video.mp4
- __MACOSX/._08611-video.mp4
