# Supplementary material
Source: ML conference proceedings conference paper supplement (https://openaccess.thecvf.com/content/ICCV2021/html/Zhao_M3D-VTON_A_Monocular-to-3D_ICCV_2021_paper.html)
Supplement: Supplementary file 1 [file Zhao_M3D-VTON_A_Monocular-to-3D_ICCV_2021_supplemental.zip › 08611-supp.pdf]

# Supplementary Material for M3D-VTON

Fuwei Zhao<sup>1</sup>, Zhenyu Xie<sup>1</sup>, Michael Kampffmeyer<sup>2</sup>, Haoye Dong<sup>1</sup>  
Songfang Han<sup>3</sup>, Tianxiang Zheng<sup>4</sup>, Tao Zhang<sup>4</sup>, Xiaodan Liang<sup>1\*</sup>

<sup>1</sup>Shenzhen Campus of SYSU, <sup>2</sup>UiT The Arctic University of Norway, <sup>3</sup>UC San Diego, <sup>4</sup>Momo

## 1. Architecture Details of M3D-VTON

### 1.1. MPM Architecture

In MPM, all the three sub-branches share the encoders  $\mathcal{E}_C$  and  $\mathcal{E}_A$ , which have the same structure and only differ in the number of input channels (3 for clothes, 29 for agnostic person). They consist of four convolutional layers with stride 2 followed by two convolutional layers with stride 1. The regressor  $\mathcal{R}$  in the warping branch has a sequence of two 2-strided convolutional layers, two 1-strided convolutional layers and one dense layer. The dense layer regresses the x and y coordinate offsets of the TPS control points and therefore has an output size of  $2 \times 3 \times 3 = 18$ . The decoder  $\mathcal{D}_S$  and  $\mathcal{D}_Z$  are used for the segmentation branch and the depth estimation branch, respectively. They both contain one 1-strided convolutional layer, succeed by four upsample-convolutional blocks to output the  $512 \times 320$  resolution results. See Table 1 for a detailed overview of this module.

### 1.2. TFM Architecture

In TFM, we use the same 12-layer UNet generator  $\mathcal{G}_T$  as in CP-VTON, which contains six 2-strided down-sampling convolutional layers and six up-sampling layers. Each convolutional layer is followed by an Instance Normalization layer and Leaky ReLU with a slope of 0.2. The 4 output channels are split into 3 channels for the rendered person and 1 channel for the fusion mask. See Figure 1 and Table 2 for the mask fusion process and the detailed architecture of TFM.

### 1.3. DRM Architecture

For DRM, we adopt an UNet-like generator  $\mathcal{G}_Z$  with two residual blocks similar to that in NormalGAN [4]. The output channel is set to 2 (one for front depth, one for back depth). See Table 3 for the detailed architecture of DRM.

## 2. Dataset Examples

Figure 3.(a) illustrates how the proposed dataset is constructed. We firstly apply PIFuHD [3], a state-of-the-

| Encoder $\mathcal{E}_C / \mathcal{E}_A$ |                                             |                |
|-----------------------------------------|---------------------------------------------|----------------|
| Layer                                   | Type                                        | Output Size    |
| Input                                   | Target Clothes / Agnostic Representation    | (512,320,3/29) |
| Conv1                                   | Conv 4x4 stride 2, ReLU, INorm              | (256,160,64)   |
| Conv2                                   | Conv 4x4 stride 2, ReLU, INorm              | (128,80,128)   |
| Conv3                                   | Conv 4x4 stride 2, ReLU, INorm              | (64,40,256)    |
| Conv4                                   | Conv 4x4 stride 2, ReLU, INorm              | (32,20,512)    |
| Conv5                                   | Conv 3x3 stride 1, ReLU, INorm              | (32,20,512)    |
| Conv6                                   | Conv 3x3 stride 1, ReLU, INorm              | (32,20,512)    |
| Conv7                                   | Conv 3x3 stride 1, ReLU, L2Norm             | (32,20,512)    |
| Feature Correlation                     |                                             |                |
| Output Size                             | (32,20,640)                                 |                |
| Feature Concatenation                   |                                             |                |
| Output Size                             | (32,20,1024)                                |                |
| Regressor $\mathcal{R}$                 |                                             |                |
| Layer                                   | Type                                        | Output Size    |
| Input                                   | Correlated Fature                           | (32,20,640)    |
| Conv1                                   | Conv 4x4 stride 2, INorm, ReLu              | (16,10,512)    |
| Conv2                                   | Conv 4x4 stride 2, INorm, ReLu              | (8,5,256)      |
| Conv3                                   | Conv 3x3 stride 1, INorm, ReLu              | (8,5,128)      |
| Conv4                                   | Conv 3x3 stride 1, INorm, ReLu              | (8,5,64)       |
| Linear                                  | Linear                                      | 50             |
| Decoder $\mathcal{D}_S / \mathcal{D}_Z$ |                                             |                |
| Layer                                   | Type                                        | Output Size    |
| Input                                   | Concatenated Featrue                        | (32,20,1024)   |
| Conv1                                   | Conv 3x3 stride 1, INorm, ReLu              | (32,20,512)    |
| Upsample1                               | Upsample x2, Conv 3x3 stride 1, INrom, ReLu | (64,40,256)    |
| Upsample2                               | Upsample x2, Conv 3x3 stride 1, INrom, ReLu | (128,80,128)   |
| Upsample3                               | Upsample x2, Conv 3x3 stride 1, INrom, ReLu | (256,160,64)   |
| Upsample4                               | Upsample x2, Conv 3x3 stride 1, INrom, ReLu | (256,160,2/20) |

Table 1. The architecture of MPM. (INorm refers to InstanceNorm).

| TFM Generator $\mathcal{G}_T$ |                                                                |               |
|-------------------------------|----------------------------------------------------------------|---------------|
| Layer                         | Type                                                           | Output Size   |
| Input                         | Input                                                          | (512,320,9)   |
| Conv1                         | Conv 4x4, LReLU                                                | (256,160,64)  |
| Conv2                         | Conv 4x4, INorm, LReLU                                         | (128,80,128)  |
| Conv3                         | Conv 4x4, INorm, LReLU                                         | (64,40,256)   |
| Conv4                         | Conv 4x4, INorm, LReLU                                         | (32,20,512)   |
| Conv5                         | Conv 4x4, INorm, LReLU                                         | (16,10,512)   |
| Conv6                         | Conv 4x4, INorm, LReLU                                         | (8,5,512)     |
| Upsample1                     | Upsample x2, Conv 3x3, INorm, ReLU, Skip connection from Conv5 | (16,10,1024)  |
| Upsample2                     | Upsample x2, Conv 3x3, INorm, ReLU, Skip connection from Conv4 | (32,20,1024)  |
| Upsample3                     | Upsample x2, Conv 3x3, INorm, ReLU, Skip connection from Conv3 | (64,40,512)   |
| Upsample4                     | Upsample x2, Conv 3x3, INorm, ReLU, Skip connection from Conv2 | (128,80,256)  |
| Upsample5                     | Upsample x2, Conv 3x3, INorm, ReLU, Skip connection from Conv1 | (256,160,128) |
| Upsample6                     | Upsample x2, Conv 3x3                                          | (512,320,4)   |

Table 2. The architecture of TFM.

art single-image 3D human reconstruction method, on the MPV2D dataset [1] to obtain high-fidelity 3D human meshes, before the meshes are orthographically projected to front and back depth maps. A data point in our MPV3D dataset is consequently represented by a four-tuple (person,

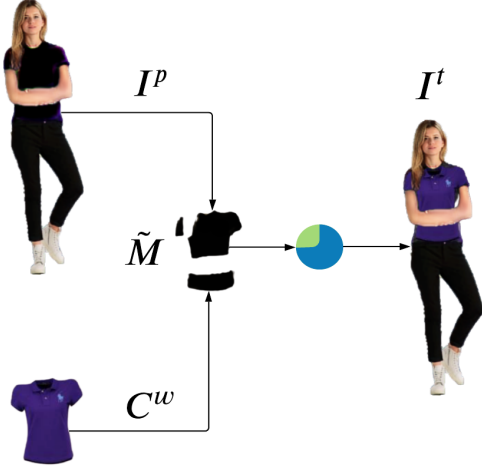

Figure 1. The mask fusion process in TFM. The fusion mask  $\tilde{M}$  is used to fuse  $C^w$  and  $I^p$  to the refined try-on result  $I^t$ , which can be formulated as:  $I^t = C^w \odot \tilde{M} + \tilde{I}^c \odot (1 - \tilde{M})$ .

| DRM Generator $\mathcal{G}_Z$ |                                         |               |
|-------------------------------|-----------------------------------------|---------------|
| Layer                         | Type                                    | Output Size   |
| Input                         | Input                                   | (512,320,12)  |
| Conv1                         | Conv 3x3 stride=1, ELU                  | (512,320,64)  |
|                               | Conv 3x3 stride=2, ELU, InstanceNorm    | (256,160,128) |
| Conv2                         | Conv 3x3 stride=1, ELU                  | (256,160,128) |
|                               | Conv 3x3 stride=1, ELU                  | (256,160,128) |
|                               | Conv 3x3 stride=2, ELU, InstanceNorm    | (128,80,256)  |
| Conv3                         | Conv 3x3 stride=1, ELU                  | (128,80,256)  |
|                               | Conv 3x3 stride=1, ELU                  | (128,80,256)  |
|                               | Conv 3x3 stride=2, ELU, InstanceNorm    | (64,40,512)   |
| Conv4                         | Conv 3x3 stride=1, ELU                  | (64,40,512)   |
|                               | Conv 3x3 stride=1, ELU                  | (64,40,512)   |
|                               | Conv 3x3 stride=2, ELU                  | (32,20,1024)  |
|                               | Conv 3x3 stride=1, InstanceNorm         | (32,20,1024)  |
| Res1                          | Residual module block                   | (32,20,1024)  |
| Res2                          | Residual module block                   | (32,20,1024)  |
| Upsample1                     | Upsample x2, skip connection from Conv3 | (64,40,1536)  |
|                               | Conv 3x3 stride=1, ELU                  | (64,40,512)   |
|                               | Conv 3x3 stride=1, ELU                  | (64,40,512)   |
|                               | Conv 3x3 stride=1, ELU, InstanceNorm    | (64,40,512)   |
| Upsample2                     | Upsample x2, skip connection from Conv2 | (128,80,768)  |
|                               | Conv 3x3 stride=1, ELU                  | (128,80,256)  |
|                               | Conv 3x3 stride=1, ELU                  | (128,80,256)  |
|                               | Conv 3x3 stride=1, ELU, InstanceNorm    | (128,80,256)  |
| Upsample3                     | Upsample x2, skip connection from Conv1 | (256,160,384) |
|                               | Conv 3x3 stride=1, ELU                  | (256,160,128) |
|                               | Conv 3x3 stride=1, ELU                  | (256,160,128) |
|                               | Conv 3x3 stride=1, ELU, InstanceNorm    | (256,160,128) |
| Upsample4                     | Upsample x2                             | (512,320,64)  |
|                               | Conv 3x3 stride=1, ELU                  | (512,320,64)  |
|                               | Conv 3x3 stride=1, ELU                  | (512,320,64)  |
|                               | Conv 3x3 stride=1, Tanh                 | (512,320,2)   |

Table 3. The architecture of the DRM.

clothing, front depth, back depth). More examples from our dataset are shown in Figure 3.(b).

### 3. Limitation and Future Work

Monocular depth estimation is a highly ill-posed problem due to the well-known depth ambiguity. The proposed M3D-VTON tends to fail in predicting depth for ambigu-

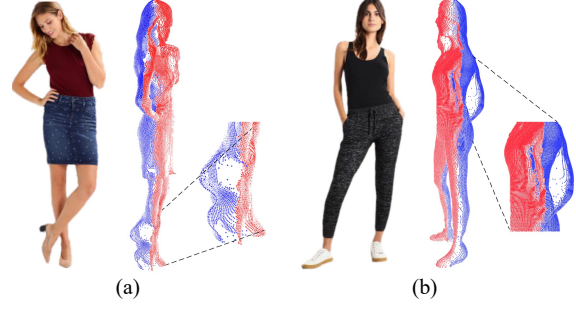

Figure 2. Failure cases for our methods on ambiguous occluded person parts. We display the front part and back part of the re-constructed point cloud in red and blue, respectively. Our method typically fails when poses are not represented well in the training dataset.

ous person parts in poses that are rarely presented in the training data. Figure 2 illustrates monocular examples that lack sufficient information for our method to perceive accurate relative depth relations. Features extracted from cross legs (Figure 2.(a)) and occluded bent arms (Figure 2.(b)) in 2D space are not reliable enough for depth estimator to tell apart the front and back side, or to stitch them up. We suspect that the results for those would improve with better representation of diverse poses in the training data or more prior information like the 3D pose, which we aim to solve in future work.

## 4. Additional Results

### 4.1. 2D Texture Fusion Results

We show more qualitative comparisons of the texture fusion results among our proposed M3D-VTON and other existing 2D try-on methods in Figure 4.

### 4.2. 3D Virtual Try-on Results

We show more qualitative comparison of the 3D virtual try-on results between M3D-VTON and other hybrid methods in Figure 5. For rotated views, please see the supplementary video.

## References

- [1] Haoye Dong, Xiaodan Liang, Xiaohui Shen, Bochao Wang, Hanjiang Lai, Jia Zhu, Zhiting Hu, and Jian Yin. Towards multi-pose guided virtual try-on network. In *Proceedings of the IEEE/CVF International Conference on Computer Vision*, pages 9026–9035, 2019. 1
- [2] Shunsuke Saito, Zeng Huang, Ryota Natsume, Shigeo Morishima, Angjoo Kanazawa, and Hao Li. Pifu: Pixel-aligned implicit function for high-resolution clothed human digitization. In *The IEEE International Conference on Computer Vision (ICCV)*, pages 2304–2314, 2019. 5
- [3] Shunsuke Saito, Tomas Simon, Jason Saragih, and Hanbyul Joo. Pifuhd: Multi-level pixel-aligned implicit function for

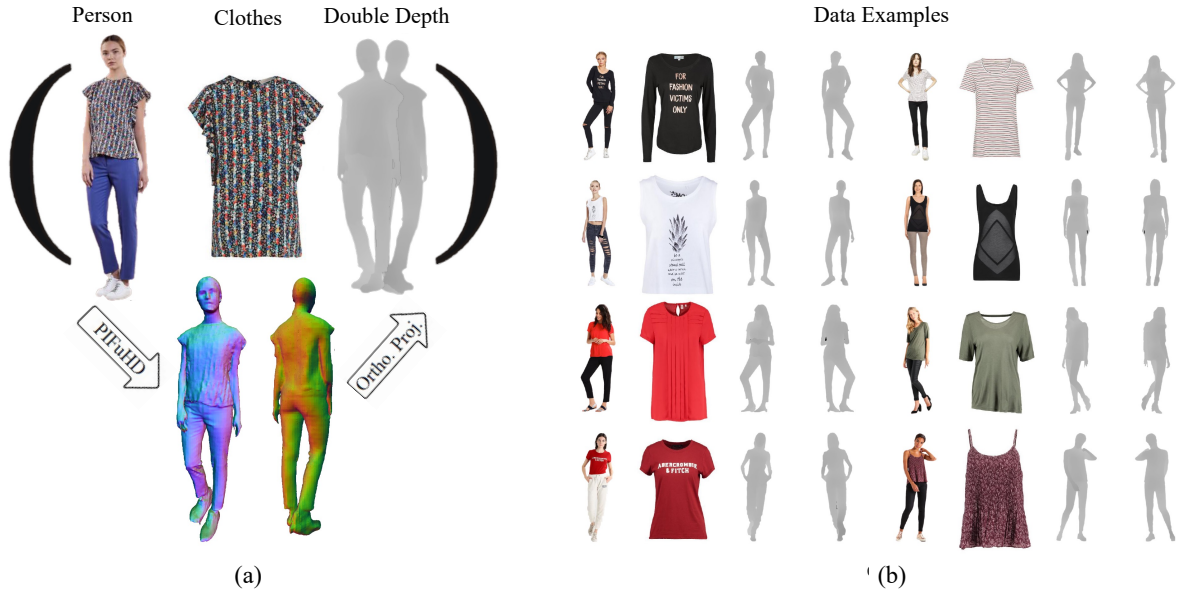

Figure 3. Procedure of how the MPV3D dataset is generated. (a) The three items enclosed in parentheses form one data data point (person, clothing, front depth, back depth) in our dataset. (b) More data examples.

high-resolution 3d human digitization. In *Proceedings of the IEEE Conference on Computer Vision and Pattern Recognition*, pages 84–93, 2020. 1

- [4] Lizhen Wang, Xiaochen Zhao, Tao Yu, Songtao Wang, and Yebin Liu. Normalgan: Learning detailed 3d human from a single rgb-d image. In *Proceedings of the European Conference on Computer Vision*, 2020. 1, 5

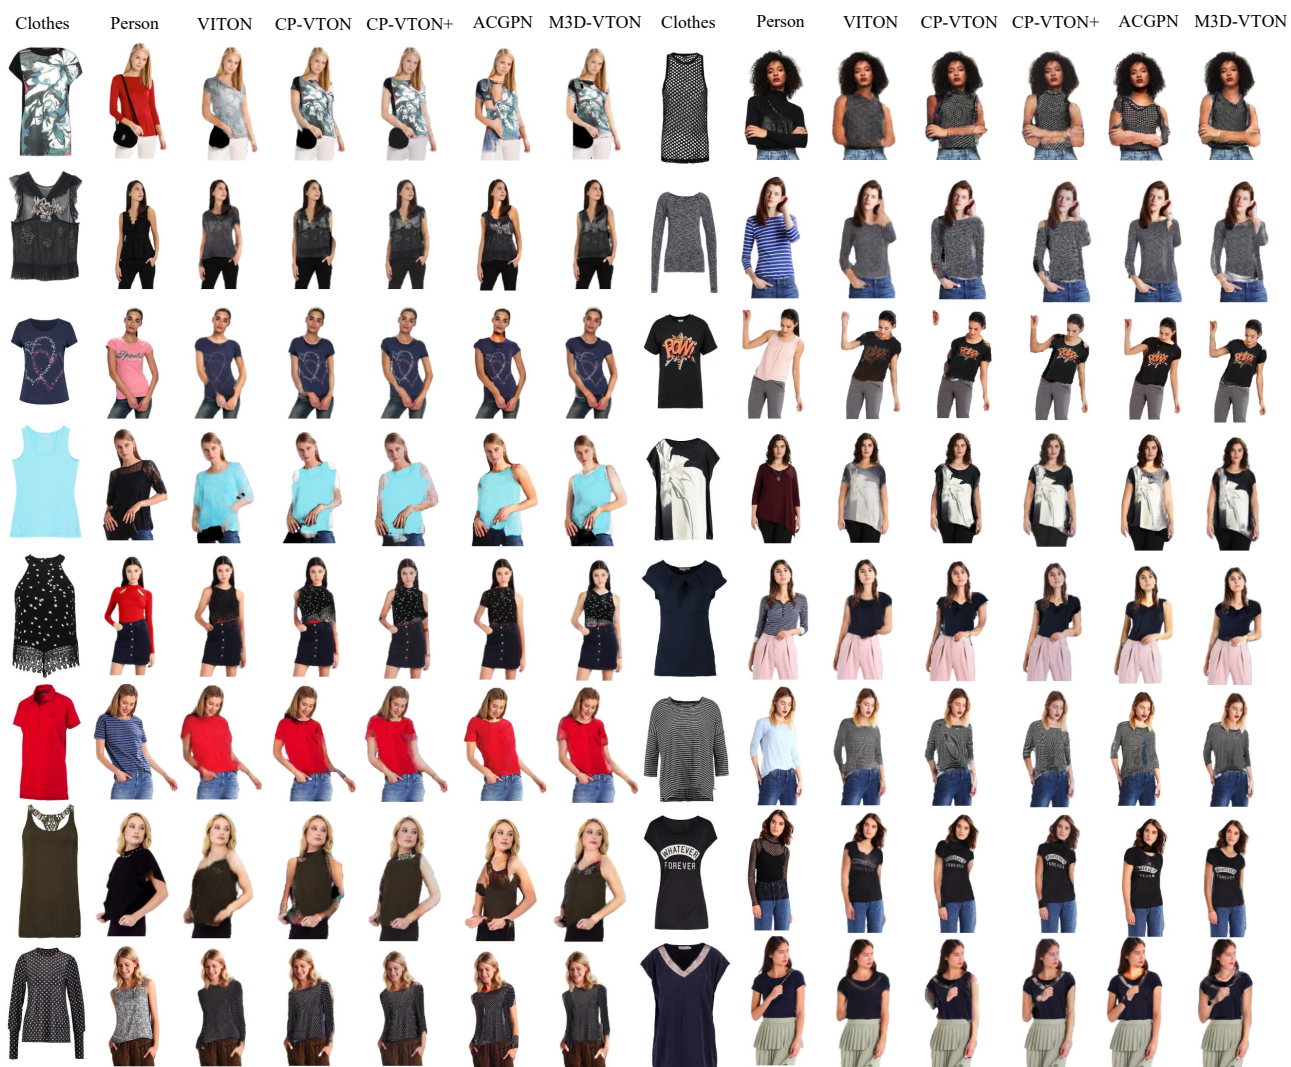

Figure 4. Additional visual comparison with the other methods in the texture fusion module. The proposed M3D-VTON produces more realistic results.

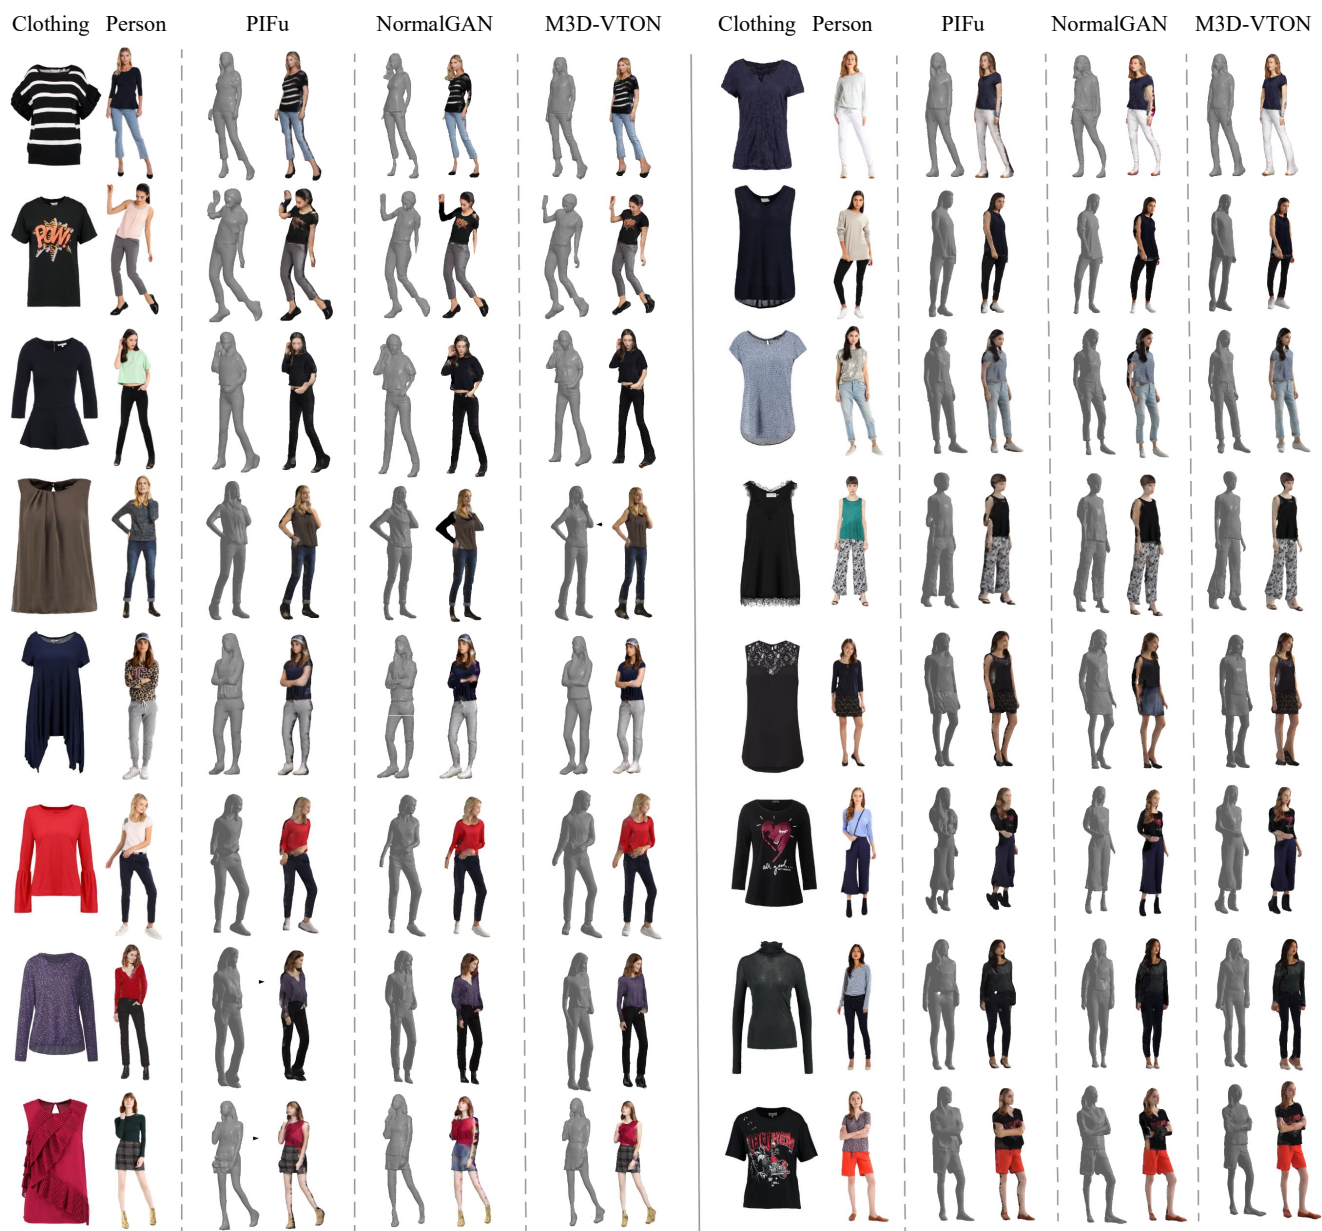

Figure 5. Additional qualitative comparisons of 3D try-on results. The human mesh generated by the proposed M3D-VTON contains more texture details and accurate shape compared with PIFu [2] and NormalGAN [4].
